# Supplementary material for: Rising inequality in mortality among working-age men and women in Sweden: a national registry-based repeated cohort study, 1990–2007
Source: PubMed Central journal article supplement — J Epidemiol Community Health. 2014 Aug 20;68(12):1145–50. doi: 10.1136/jech-2013-203619 (PMC4255670; doi:10.1136/jech-2013-203619), 2014-08-20

**Supplemental Table 1** Full descriptions of the characteristics of Swedish working-age population (30–64 y.o.) by cohort

|                   | MEN        |           |                           | WOMEN      |           |                           |
|-------------------|------------|-----------|---------------------------|------------|-----------|---------------------------|
|                   | Population | Mortality | Mortality rate (/100,000) | Population | Mortality | Mortality rate (/100,000) |
| <b>1990–1993</b>  |            |           |                           |            |           |                           |
| Total             | 1,883,651  | 7,448     | 395.4                     | 1,836,890  | 4,269     | 232.4                     |
| <b>Age groups</b> |            |           |                           |            |           |                           |
| 30–34             | 289,810    | 274       | 94.5                      | 273,366    | 135       | 49.4                      |
| 35–39             | 288,216    | 396       | 137.4                     | 275,741    | 178       | 64.6                      |
| 40–44             | 298,383    | 547       | 183.3                     | 287,287    | 297       | 103.4                     |
| 45–49             | 332,420    | 914       | 275.0                     | 320,325    | 592       | 184.8                     |
| 50–54             | 266,021    | 1,203     | 452.2                     | 256,854    | 703       | 273.7                     |
| 55–59             | 212,356    | 1,633     | 769.0                     | 213,980    | 919       | 429.5                     |
| 60–64             | 196,445    | 2,481     | 1,262.9                   | 209,337    | 1,445     | 690.3                     |
| <b>Income</b>     |            |           |                           |            |           |                           |
| Q1                | 376,601    | 2,741     | 727.8                     | 365,773    | 1,220     | 333.5                     |
| Q2                | 375,140    | 1,768     | 471.3                     | 367,228    | 1,014     | 276.1                     |
| Q3                | 377,854    | 1,154     | 305.4                     | 367,080    | 755       | 205.7                     |
| Q4                | 377,091    | 941       | 249.5                     | 368,545    | 649       | 176.1                     |
| Q5(highest)       | 376,965    | 844       | 223.9                     | 368,264    | 631       | 171.3                     |
| <b>1991–1994</b>  |            |           |                           |            |           |                           |
| Total             | 1,904,072  | 7,262     | 381.4                     | 1,854,850  | 4,357     | 234.9                     |
| <b>Age groups</b> |            |           |                           |            |           |                           |
| 30–34             | 298,726    | 283       | 94.7                      | 282,396    | 131       | 46.4                      |
| 35–39             | 288,989    | 400       | 138.4                     | 275,684    | 214       | 77.6                      |
| 40–44             | 291,779    | 581       | 199.1                     | 280,435    | 298       | 106.3                     |
| 45–49             | 327,437    | 858       | 262.0                     | 317,622    | 613       | 193.0                     |
| 50–54             | 283,002    | 1,195     | 422.3                     | 272,199    | 759       | 278.8                     |
| 55–59             | 219,455    | 1,603     | 730.4                     | 219,666    | 956       | 435.2                     |
| 60–64             | 194,684    | 2,342     | 1,203.0                   | 206,848    | 1,386     | 670.1                     |
| <b>Income</b>     |            |           |                           |            |           |                           |
| Q1                | 379,780    | 2,723     | 717.0                     | 370,146    | 1,320     | 356.6                     |
| Q2                | 380,575    | 1,582     | 415.7                     | 370,679    | 969       | 261.4                     |
| Q3                | 382,063    | 1,184     | 309.9                     | 370,556    | 756       | 204.0                     |

|             |           |       |         |           |       |       |
|-------------|-----------|-------|---------|-----------|-------|-------|
| Q4          | 380,799   | 912   | 239.5   | 371,716   | 689   | 185.4 |
| Q5(highest) | 380,855   | 861   | 226.1   | 371,753   | 623   | 167.6 |
| <hr/>       |           |       |         |           |       |       |
| 1992–1995   |           |       |         |           |       |       |
| Total       | 1,923,096 | 7,236 | 376.3   | 1,870,377 | 4,251 | 227.3 |
| Age groups  |           |       |         |           |       |       |
| 30–34       | 308,908   | 286   | 92.6    | 290,895   | 126   | 43.3  |
| 35–39       | 287,059   | 337   | 117.4   | 273,834   | 161   | 58.8  |
| 40–44       | 288,062   | 549   | 190.6   | 277,785   | 288   | 103.7 |
| 45–49       | 319,793   | 876   | 273.9   | 310,756   | 527   | 169.6 |
| 50–54       | 300,694   | 1,296 | 431.0   | 289,319   | 836   | 289.0 |
| 55–59       | 224,922   | 1,531 | 680.7   | 224,207   | 904   | 403.2 |
| 60–64       | 193,658   | 2,361 | 1,219.2 | 203,581   | 1,409 | 692.1 |
| Income      |           |       |         |           |       |       |
| Q1          | 384,007   | 2,586 | 673.4   | 373,420   | 1,386 | 371.2 |
| Q2          | 384,957   | 1,632 | 423.9   | 373,048   | 973   | 260.8 |
| Q3          | 384,383   | 1,186 | 308.5   | 374,814   | 693   | 184.9 |
| Q4          | 385,106   | 1,001 | 259.9   | 373,995   | 623   | 166.6 |
| Q5(highest) | 384,643   | 831   | 216.0   | 375,100   | 576   | 153.6 |
| <hr/>       |           |       |         |           |       |       |
| 1993–1996   |           |       |         |           |       |       |
| Total       | 1,946,686 | 7,007 | 359.9   | 1,891,315 | 4,232 | 223.8 |
| Age groups  |           |       |         |           |       |       |
| 30–34       | 318,339   | 269   | 84.5    | 299,687   | 123   | 41.0  |
| 35–39       | 286,452   | 328   | 114.5   | 273,515   | 163   | 59.6  |
| 40–44       | 289,509   | 473   | 163.4   | 278,574   | 259   | 93.0  |
| 45–49       | 309,984   | 800   | 258.1   | 301,697   | 513   | 170.0 |
| 50–54       | 316,194   | 1,361 | 430.4   | 304,793   | 851   | 279.2 |
| 55–59       | 231,555   | 1,533 | 662.0   | 229,465   | 972   | 423.6 |
| 60–64       | 194,653   | 2,243 | 1,152.3 | 203,584   | 1,351 | 663.6 |
| Income      |           |       |         |           |       |       |
| Q1          | 388,422   | 2,385 | 614.0   | 377,906   | 1,292 | 341.9 |
| Q2          | 389,796   | 1,734 | 444.8   | 378,118   | 989   | 261.6 |
| Q3          | 389,430   | 1,082 | 277.8   | 378,451   | 703   | 185.8 |
| Q4          | 388,826   | 970   | 249.5   | 378,553   | 635   | 167.7 |
| Q5(highest) | 390,212   | 836   | 214.2   | 378,287   | 613   | 162.0 |
| <hr/>       |           |       |         |           |       |       |
| 1994–1997   |           |       |         |           |       |       |
| Total       | 1,972,227 | 7,060 | 358.0   | 1,914,880 | 4,085 | 213.3 |

|             |           |       |         |           |       |       |
|-------------|-----------|-------|---------|-----------|-------|-------|
| Age groups  |           |       |         |           |       |       |
| 30-34       | 325,391   | 238   | 73.1    | 306,780   | 129   | 42.0  |
| 35-39       | 289,166   | 341   | 117.9   | 275,076   | 165   | 60.0  |
| 40-44       | 290,183   | 466   | 160.6   | 279,857   | 258   | 92.2  |
| 45-49       | 302,454   | 768   | 253.9   | 294,297   | 449   | 152.6 |
| 50-54       | 324,073   | 1,365 | 421.2   | 313,941   | 844   | 268.8 |
| 55-59       | 243,583   | 1,570 | 644.5   | 240,003   | 960   | 400.0 |
| 60-64       | 197,377   | 2,312 | 1,171.4 | 204,926   | 1,280 | 624.6 |
| Income      |           |       |         |           |       |       |
| Q1          | 393,750   | 2,328 | 591.2   | 382,690   | 1,155 | 301.8 |
| Q2          | 393,931   | 1,685 | 427.7   | 383,084   | 988   | 257.9 |
| Q3          | 395,356   | 1,221 | 308.8   | 382,458   | 753   | 196.9 |
| Q4          | 394,633   | 996   | 252.4   | 382,823   | 644   | 168.2 |
| Q5(highest) | 394,557   | 830   | 210.4   | 383,825   | 545   | 142.0 |
| <hr/>       |           |       |         |           |       |       |
| 1995-1998   |           |       |         |           |       |       |
| Total       | 1,986,804 | 6,906 | 347.6   | 1,930,198 | 4,227 | 219.0 |
| Age groups  |           |       |         |           |       |       |
| 30-34       | 323,171   | 238   | 73.6    | 306,183   | 109   | 35.6  |
| 35-39       | 292,655   | 324   | 110.7   | 278,229   | 170   | 61.1  |
| 40-44       | 288,535   | 453   | 157.0   | 278,331   | 285   | 102.4 |
| 45-49       | 295,491   | 713   | 241.3   | 287,054   | 452   | 157.5 |
| 50-54       | 325,769   | 1,276 | 391.7   | 317,192   | 804   | 253.5 |
| 55-59       | 258,149   | 1,671 | 647.3   | 253,238   | 1,014 | 400.4 |
| 60-64       | 203,034   | 2,231 | 1,098.8 | 209,971   | 1,393 | 663.4 |
| Income      |           |       |         |           |       |       |
| Q1          | 396,883   | 2,326 | 586.1   | 385,218   | 1,271 | 329.9 |
| Q2          | 396,650   | 1,737 | 437.9   | 384,992   | 1,050 | 272.7 |
| Q3          | 397,891   | 1,082 | 271.9   | 386,316   | 726   | 187.9 |
| Q4          | 397,347   | 952   | 239.6   | 387,398   | 567   | 146.4 |
| Q5(highest) | 398,033   | 809   | 203.2   | 386,274   | 613   | 158.7 |
| <hr/>       |           |       |         |           |       |       |
| 1996-1999   |           |       |         |           |       |       |
| Total       | 1,997,460 | 6,883 | 344.6   | 1,940,194 | 4,265 | 219.8 |
| Age groups  |           |       |         |           |       |       |
| 30-34       | 313,580   | 238   | 75.9    | 297,417   | 102   | 34.3  |
| 35-39       | 300,348   | 314   | 104.5   | 286,085   | 160   | 55.9  |
| 40-44       | 288,558   | 481   | 166.7   | 277,880   | 294   | 105.8 |

|             |           |       |         |           |       |       |
|-------------|-----------|-------|---------|-----------|-------|-------|
| 45-49       | 288,934   | 694   | 240.2   | 280,464   | 466   | 166.2 |
| 50-54       | 321,235   | 1,260 | 392.2   | 314,600   | 803   | 255.2 |
| 55-59       | 274,650   | 1,724 | 627.7   | 268,248   | 1,063 | 396.3 |
| 60-64       | 210,155   | 2,172 | 1,033.5 | 215,500   | 1,377 | 639.0 |
| Income      |           |       |         |           |       |       |
| Q1          | 399,439   | 2,440 | 610.9   | 386,724   | 1,235 | 319.3 |
| Q2          | 399,128   | 1,679 | 420.7   | 387,400   | 1,060 | 273.6 |
| Q3          | 398,329   | 1,065 | 267.4   | 388,615   | 779   | 200.5 |
| Q4          | 401,015   | 909   | 226.7   | 389,414   | 596   | 153.1 |
| Q5(highest) | 399,549   | 790   | 197.7   | 388,041   | 595   | 153.3 |
| <hr/>       |           |       |         |           |       |       |
| 1997-2000   |           |       |         |           |       |       |
| Total       | 2,008,500 | 6,726 | 334.9   | 1,952,129 | 4,408 | 225.8 |
| Age groups  |           |       |         |           |       |       |
| 30-34       | 304,483   | 212   | 69.6    | 290,640   | 69    | 23.7  |
| 35-39       | 310,002   | 302   | 97.4    | 294,372   | 186   | 63.2  |
| 40-44       | 286,755   | 397   | 138.4   | 276,022   | 250   | 90.6  |
| 45-49       | 285,665   | 698   | 244.3   | 278,132   | 440   | 158.2 |
| 50-54       | 314,010   | 1,184 | 377.1   | 308,160   | 792   | 257.0 |
| 55-59       | 291,917   | 1,730 | 592.6   | 284,869   | 1,233 | 432.8 |
| 60-64       | 215,668   | 2,203 | 1,021.5 | 219,934   | 1,438 | 653.8 |
| Income      |           |       |         |           |       |       |
| Q1          | 401,072   | 2,322 | 578.9   | 390,227   | 1,344 | 344.4 |
| Q2          | 401,527   | 1,636 | 407.4   | 389,124   | 1,089 | 279.9 |
| Q3          | 401,422   | 1,027 | 255.8   | 390,368   | 764   | 195.7 |
| Q4          | 402,636   | 894   | 222.0   | 391,809   | 624   | 159.3 |
| Q5(highest) | 401,843   | 847   | 210.8   | 390,601   | 587   | 150.3 |
| <hr/>       |           |       |         |           |       |       |
| 1998-2001   |           |       |         |           |       |       |
| Total       | 2,022,253 | 6,853 | 338.9   | 1,964,837 | 4,274 | 217.5 |
| Age groups  |           |       |         |           |       |       |
| 30-34       | 298,540   | 217   | 72.7    | 285,960   | 90    | 31.5  |
| 35-39       | 318,425   | 320   | 100.5   | 302,052   | 148   | 49.0  |
| 40-44       | 285,221   | 437   | 153.2   | 274,847   | 235   | 85.5  |
| 45-49       | 286,617   | 716   | 249.8   | 278,352   | 442   | 158.8 |
| 50-54       | 304,248   | 1,147 | 377.0   | 299,128   | 786   | 262.8 |
| 55-59       | 307,203   | 1,843 | 599.9   | 299,833   | 1,226 | 408.9 |
| 60-64       | 221,999   | 2,173 | 978.8   | 224,665   | 1,347 | 599.6 |

|             |           |       |       |           |       |       |
|-------------|-----------|-------|-------|-----------|-------|-------|
| Income      |           |       |       |           |       |       |
| Q1          | 403,565   | 2,503 | 620.2 | 392,130   | 1,316 | 335.6 |
| Q2          | 405,146   | 1,665 | 411.0 | 392,548   | 1,058 | 269.5 |
| Q3          | 403,173   | 1,049 | 260.2 | 392,795   | 720   | 183.3 |
| Q4          | 405,868   | 846   | 208.4 | 393,904   | 615   | 156.1 |
| Q5(highest) | 404,501   | 790   | 195.3 | 393,460   | 565   | 143.6 |
| <hr/>       |           |       |       |           |       |       |
| 1999–2002   |           |       |       |           |       |       |
| Total       | 2,033,105 | 6,832 | 336.0 | 1,976,057 | 4,253 | 215.2 |
| Age groups  |           |       |       |           |       |       |
| 30–34       | 292,808   | 206   | 70.4  | 281,437   | 105   | 37.3  |
| 35–39       | 323,788   | 288   | 88.9  | 307,214   | 159   | 51.8  |
| 40–44       | 286,095   | 419   | 146.5 | 274,758   | 223   | 81.2  |
| 45–49       | 286,010   | 622   | 217.5 | 278,462   | 403   | 144.7 |
| 50–54       | 296,255   | 1,086 | 366.6 | 291,231   | 687   | 235.9 |
| 55–59       | 314,629   | 1,903 | 604.8 | 308,649   | 1,256 | 406.9 |
| 60–64       | 233,520   | 2,308 | 988.4 | 234,306   | 1,420 | 606.0 |
| Income      |           |       |       |           |       |       |
| Q1          | 405,917   | 2,541 | 626.0 | 394,418   | 1,359 | 344.6 |
| Q2          | 407,176   | 1,591 | 390.7 | 394,044   | 1,028 | 260.9 |
| Q3          | 405,740   | 1,046 | 257.8 | 395,498   | 664   | 167.9 |
| Q4          | 407,014   | 881   | 216.5 | 396,270   | 596   | 150.4 |
| Q5(highest) | 407,258   | 773   | 189.8 | 395,827   | 606   | 153.1 |
| <hr/>       |           |       |       |           |       |       |
| 2000–2003   |           |       |       |           |       |       |
| Total       | 2,042,689 | 6,735 | 329.7 | 1,985,536 | 4,243 | 213.7 |
| Age groups  |           |       |       |           |       |       |
| 30–34       | 290,628   | 175   | 60.2  | 279,369   | 97    | 34.7  |
| 35–39       | 322,623   | 296   | 91.7  | 307,352   | 157   | 51.1  |
| 40–44       | 290,435   | 416   | 143.2 | 278,458   | 241   | 86.5  |
| 45–49       | 284,907   | 661   | 232.0 | 277,313   | 404   | 145.7 |
| 50–54       | 289,876   | 1,036 | 357.4 | 284,201   | 670   | 235.7 |
| 55–59       | 316,760   | 1,839 | 580.6 | 311,904   | 1,196 | 383.5 |
| 60–64       | 247,460   | 2,312 | 934.3 | 246,939   | 1,478 | 598.5 |
| Income      |           |       |       |           |       |       |
| Q1          | 407,774   | 2,694 | 660.7 | 396,406   | 1,486 | 374.9 |
| Q2          | 408,799   | 1,459 | 356.9 | 397,216   | 1,016 | 255.8 |
| Q3          | 408,548   | 1,009 | 247.0 | 396,217   | 653   | 164.8 |

|             |           |       |       |           |       |       |
|-------------|-----------|-------|-------|-----------|-------|-------|
| Q4          | 408,983   | 849   | 207.6 | 398,501   | 539   | 135.3 |
| Q5(highest) | 408,585   | 724   | 177.2 | 397,196   | 549   | 138.2 |
| <hr/>       |           |       |       |           |       |       |
| 2001–2004   |           |       |       |           |       |       |
| Total       | 2,050,955 | 6,776 | 330.4 | 1,993,991 | 4,427 | 222.0 |
| Age groups  |           |       |       |           |       |       |
| 30–34       | 291,720   | 192   | 65.8  | 280,349   | 105   | 37.5  |
| 35–39       | 314,442   | 273   | 86.8  | 299,812   | 172   | 57.4  |
| 40–44       | 298,866   | 405   | 135.5 | 287,012   | 253   | 88.1  |
| 45–49       | 285,630   | 643   | 225.1 | 277,448   | 418   | 150.7 |
| 50–54       | 283,904   | 1,052 | 370.5 | 278,168   | 650   | 233.7 |
| 55–59       | 312,719   | 1,837 | 587.4 | 309,622   | 1,204 | 388.9 |
| 60–64       | 263,674   | 2,374 | 900.4 | 261,580   | 1,625 | 621.2 |
| Income      |           |       |       |           |       |       |
| Q1          | 409,498   | 2,608 | 636.9 | 397,944   | 1,548 | 389.0 |
| Q2          | 409,508   | 1,515 | 370.0 | 399,592   | 1,048 | 262.3 |
| Q3          | 411,174   | 1,010 | 245.6 | 398,583   | 664   | 166.6 |
| Q4          | 410,229   | 843   | 205.5 | 399,044   | 584   | 146.3 |
| Q5(highest) | 410,546   | 800   | 194.9 | 398,828   | 583   | 146.2 |
| <hr/>       |           |       |       |           |       |       |
| 2002–2005   |           |       |       |           |       |       |
| Total       | 2,048,096 | 6,699 | 327.1 | 1,992,640 | 4,378 | 219.7 |
| Age groups  |           |       |       |           |       |       |
| 30–34       | 286,856   | 180   | 62.7  | 275,184   | 96    | 34.9  |
| 35–39       | 304,314   | 245   | 80.5  | 291,690   | 153   | 52.5  |
| 40–44       | 307,362   | 397   | 129.2 | 294,088   | 230   | 78.2  |
| 45–49       | 283,299   | 605   | 213.6 | 275,276   | 368   | 133.7 |
| 50–54       | 280,490   | 995   | 354.7 | 275,688   | 681   | 247.0 |
| 55–59       | 305,496   | 1,722 | 563.7 | 303,157   | 1,168 | 385.3 |
| 60–64       | 280,279   | 2,555 | 911.6 | 277,557   | 1,682 | 606.0 |
| Income      |           |       |       |           |       |       |
| Q1          | 409,185   | 2,705 | 661.1 | 398,488   | 1,551 | 389.2 |
| Q2          | 409,378   | 1,451 | 354.4 | 397,585   | 1,068 | 268.6 |
| Q3          | 409,238   | 972   | 237.5 | 398,968   | 661   | 165.7 |
| Q4          | 410,402   | 818   | 199.3 | 399,067   | 574   | 143.8 |
| Q5(highest) | 409,893   | 753   | 183.7 | 398,532   | 524   | 131.5 |
| <hr/>       |           |       |       |           |       |       |
| 2003–2006   |           |       |       |           |       |       |
| Total       | 2,038,952 | 6,643 | 325.8 | 1,985,061 | 4,260 | 214.6 |

|             |           |       |       |           |       |       |
|-------------|-----------|-------|-------|-----------|-------|-------|
| Age groups  |           |       |       |           |       |       |
| 30-34       | 276,930   | 176   | 63.6  | 265,580   | 104   | 39.2  |
| 35-39       | 296,098   | 253   | 85.4  | 284,832   | 152   | 53.4  |
| 40-44       | 314,071   | 409   | 130.2 | 300,222   | 220   | 73.3  |
| 45-49       | 280,599   | 539   | 192.1 | 273,138   | 380   | 139.1 |
| 50-54       | 280,887   | 984   | 350.3 | 275,228   | 635   | 230.7 |
| 55-59       | 295,584   | 1,664 | 563.0 | 294,058   | 1,055 | 358.8 |
| 60-64       | 294,783   | 2,618 | 888.1 | 292,003   | 1,714 | 587.0 |
| Income      |           |       |       |           |       |       |
| Q1          | 407,441   | 2,753 | 675.7 | 396,992   | 1,686 | 424.7 |
| Q2          | 407,201   | 1,371 | 336.7 | 396,801   | 889   | 224.0 |
| Q3          | 408,235   | 941   | 230.5 | 397,239   | 633   | 159.3 |
| Q4          | 408,159   | 836   | 204.8 | 396,237   | 528   | 133.3 |
| Q5(highest) | 407,916   | 742   | 181.9 | 397,792   | 524   | 131.7 |
| <hr/>       |           |       |       |           |       |       |
| 2004-2007   |           |       |       |           |       |       |
| Total       | 2,022,279 | 6,547 | 323.7 | 1,970,943 | 4,106 | 208.3 |
| Age groups  |           |       |       |           |       |       |
| 30-34       | 266,632   | 174   | 65.3  | 255,235   | 74    | 29.0  |
| 35-39       | 288,074   | 224   | 77.8  | 278,090   | 146   | 52.5  |
| 40-44       | 318,034   | 410   | 128.9 | 304,049   | 229   | 75.3  |
| 45-49       | 280,576   | 563   | 200.7 | 272,187   | 361   | 132.6 |
| 50-54       | 279,724   | 976   | 348.9 | 274,930   | 601   | 218.6 |
| 55-59       | 287,480   | 1,530 | 532.2 | 286,022   | 1,003 | 350.7 |
| 60-64       | 301,759   | 2,670 | 884.8 | 300,430   | 1,692 | 563.2 |
| Income      |           |       |       |           |       |       |
| Q1          | 403,759   | 2,714 | 672.2 | 393,782   | 1,373 | 348.7 |
| Q2          | 405,003   | 1,454 | 359.0 | 393,914   | 1,008 | 255.9 |
| Q3          | 404,291   | 931   | 230.3 | 393,373   | 658   | 167.3 |
| Q4          | 404,470   | 725   | 179.2 | 395,217   | 548   | 138.7 |
| Q5(highest) | 404,756   | 723   | 178.6 | 394,657   | 519   | 131.5 |
| <hr/>       |           |       |       |           |       |       |

**Supplemental Table 2** Multiple disparity measures of age-standardised mortality rates by income quintile: Swedish working-age population (30–64 years old), 1990–2004

| MEN                             |           | 1990  | 1991  | 1992  | 1993  | 1994  | 1995  | 1996  | 1997  | 1998  | 1999  | 2000  | 2001  | 2002  | 2003  | 2004  |
|---------------------------------|-----------|-------|-------|-------|-------|-------|-------|-------|-------|-------|-------|-------|-------|-------|-------|-------|
| <b><u>ABSOLUTE MEASURES</u></b> |           |       |       |       |       |       |       |       |       |       |       |       |       |       |       |       |
| Range Difference                | Estimate  | 539.6 | 537.2 | 516.7 | 480.8 | 483.9 | 472.0 | 492.0 | 450.4 | 492.3 | 492.1 | 518.6 | 473.5 | 496.7 | 510.7 | 487.5 |
|                                 | Std Error | 17.3  | 16.9  | 16.4  | 15.8  | 15.6  | 15.2  | 15.0  | 14.5  | 14.5  | 14.2  | 14.2  | 13.9  | 13.8  | 13.8  | 13.6  |
|                                 | Upper CL  | 573.5 | 570.3 | 548.8 | 511.8 | 514.5 | 501.8 | 521.5 | 478.9 | 520.8 | 520.0 | 546.4 | 500.8 | 523.8 | 537.8 | 514.2 |
|                                 | Lower CL  | 505.7 | 504.1 | 484.6 | 449.8 | 453.3 | 442.2 | 462.5 | 421.9 | 463.8 | 464.2 | 490.8 | 446.2 | 469.6 | 483.6 | 460.8 |
| Between-Group Variance          | Estimate  | 38217 | 37059 | 33073 | 30305 | 28967 | 29133 | 31580 | 26964 | 32213 | 31087 | 34294 | 29730 | 32372 | 33923 | 31822 |
|                                 | Std Error | 2340  | 2282  | 2070  | 1882  | 1814  | 1770  | 1845  | 1648  | 1812  | 1764  | 1889  | 1705  | 1789  | 1863  | 1747  |
|                                 | Upper CL  | 42802 | 41531 | 37130 | 33995 | 32523 | 32602 | 35196 | 30195 | 35764 | 34545 | 37995 | 33071 | 35879 | 37575 | 35245 |
|                                 | Lower CL  | 33631 | 32587 | 29016 | 26616 | 25412 | 25664 | 27963 | 23733 | 28661 | 27629 | 30592 | 26389 | 28865 | 30271 | 28398 |
| Absolute Concentration Index    | Estimate  | 101.9 | 99.3  | 96.1  | 93.3  | 92.9  | 92.3  | 95.2  | 87.5  | 95.5  | 93.3  | 95.1  | 88.7  | 91.4  | 91.6  | 90.2  |
|                                 | Std Error | 3.0   | 2.9   | 2.9   | 2.8   | 2.7   | 2.7   | 2.6   | 2.5   | 2.5   | 2.5   | 2.4   | 2.4   | 2.4   | 2.4   | 2.3   |
|                                 | Upper CL  | 107.8 | 105.0 | 101.7 | 98.8  | 98.3  | 97.5  | 100.3 | 92.5  | 100.4 | 98.1  | 99.9  | 93.4  | 96.0  | 96.2  | 94.7  |
|                                 | Lower CL  | 96.0  | 93.6  | 90.5  | 87.9  | 87.5  | 87.0  | 90.1  | 82.6  | 90.5  | 88.4  | 90.3  | 84.0  | 86.7  | 86.9  | 85.6  |
| Slope Index of Inequality       | Estimate  | 636.9 | 620.6 | 600.5 | 583.4 | 580.6 | 576.7 | 595.0 | 547.2 | 596.7 | 582.9 | 594.2 | 554.4 | 571.0 | 572.3 | 563.5 |
|                                 | Std Error | 18.8  | 18.2  | 17.8  | 17.4  | 17.1  | 16.7  | 16.4  | 15.9  | 15.8  | 15.5  | 15.3  | 15.0  | 14.9  | 14.9  | 14.6  |
|                                 | Upper CL  | 673.6 | 656.3 | 635.4 | 617.4 | 614.1 | 609.4 | 627.2 | 578.3 | 627.7 | 613.2 | 624.2 | 583.8 | 600.1 | 601.5 | 592.1 |
|                                 | Lower CL  | 600.1 | 584.8 | 565.5 | 549.4 | 547.1 | 544.1 | 562.8 | 516.0 | 565.7 | 552.6 | 564.2 | 524.9 | 541.8 | 543.2 | 534.8 |
| <b><u>RELATIVE MEASURES</u></b> |           |       |       |       |       |       |       |       |       |       |       |       |       |       |       |       |
| Range Ratio                     | Estimate  | 3.30  | 3.38  | 3.44  | 3.38  | 3.54  | 3.58  | 3.80  | 3.52  | 3.94  | 4.09  | 4.46  | 3.88  | 4.28  | 4.51  | 4.36  |
|                                 | Std Error | 0.13  | 0.14  | 0.14  | 0.14  | 0.15  | 0.15  | 0.16  | 0.14  | 0.16  | 0.17  | 0.19  | 0.16  | 0.18  | 0.19  | 0.19  |
|                                 | Upper CL  | 3.57  | 3.66  | 3.72  | 3.67  | 3.84  | 3.88  | 4.13  | 3.81  | 4.28  | 4.44  | 4.84  | 4.21  | 4.65  | 4.90  | 4.75  |
|                                 | Lower CL  | 3.04  | 3.12  | 3.17  | 3.12  | 3.27  | 3.30  | 3.50  | 3.25  | 3.63  | 3.77  | 4.10  | 3.58  | 3.94  | 4.15  | 4.01  |
| Index of Disparity              | Estimate  | 97.3  | 98.7  | 109.7 | 112.4 | 126.0 | 124.6 | 129.6 | 114.4 | 130.9 | 137.5 | 143.7 | 117.3 | 130.9 | 136.5 | 130.6 |
|                                 | Std Error | 7.5   | 7.4   | 8.0   | 8.1   | 8.5   | 8.6   | 8.9   | 8.1   | 8.9   | 9.2   | 9.8   | 8.3   | 9.2   | 9.5   | 9.4   |
|                                 | Upper CL  | 111.9 | 113.2 | 125.4 | 128.2 | 142.5 | 141.5 | 147.0 | 130.2 | 148.4 | 155.5 | 162.9 | 133.6 | 148.9 | 155.1 | 149.1 |



|                                       |           |       |       |        |        |        |       |       |       |        |        |        |        |        |        |        |
|---------------------------------------|-----------|-------|-------|--------|--------|--------|-------|-------|-------|--------|--------|--------|--------|--------|--------|--------|
|                                       | Lower CL  | 82.6  | 84.2  | 94.1   | 96.6   | 109.4  | 107.8 | 112.2 | 98.6  | 113.4  | 119.5  | 124.6  | 101.1  | 112.8  | 117.9  | 112.1  |
| Mean Log Deviation                    | Estimate  | 0.096 | 0.098 | 0.094  | 0.097  | 0.096  | 0.104 | 0.116 | 0.106 | 0.127  | 0.127  | 0.142  | 0.127  | 0.143  | 0.150  | 0.152  |
|                                       | Std Error | 0.005 | 0.005 | 0.005  | 0.005  | 0.005  | 0.006 | 0.006 | 0.006 | 0.006  | 0.006  | 0.007  | 0.006  | 0.007  | 0.007  | 0.007  |
|                                       | Upper CL  | 0.107 | 0.108 | 0.104  | 0.108  | 0.107  | 0.115 | 0.127 | 0.118 | 0.139  | 0.139  | 0.155  | 0.139  | 0.156  | 0.164  | 0.166  |
| Theil Index                           | Lower CL  | 0.086 | 0.088 | 0.084  | 0.087  | 0.086  | 0.093 | 0.104 | 0.095 | 0.115  | 0.115  | 0.130  | 0.115  | 0.130  | 0.137  | 0.139  |
|                                       | Estimate  | 0.100 | 0.103 | 0.096  | 0.098  | 0.095  | 0.104 | 0.116 | 0.108 | 0.128  | 0.129  | 0.147  | 0.132  | 0.149  | 0.160  | 0.160  |
|                                       | Std Error | 0.005 | 0.005 | 0.005  | 0.005  | 0.005  | 0.005 | 0.006 | 0.006 | 0.006  | 0.006  | 0.007  | 0.006  | 0.007  | 0.007  | 0.007  |
| Relative Concentration Index          | Upper CL  | 0.111 | 0.113 | 0.107  | 0.108  | 0.105  | 0.114 | 0.127 | 0.119 | 0.140  | 0.141  | 0.160  | 0.144  | 0.163  | 0.173  | 0.174  |
|                                       | Lower CL  | 0.090 | 0.092 | 0.086  | 0.087  | 0.085  | 0.093 | 0.105 | 0.097 | 0.116  | 0.117  | 0.134  | 0.120  | 0.136  | 0.146  | 0.146  |
|                                       | Disparity | 0.244 | 0.246 | 0.241  | 0.244  | 0.243  | 0.252 | 0.266 | 0.256 | 0.279  | 0.279  | 0.295  | 0.279  | 0.295  | 0.301  | 0.304  |
| Concentration Index                   | Estimate  | 0.000 | 0.729 | -1.182 | -0.096 | -0.327 | 3.346 | 9.102 | 4.791 | 14.200 | 14.417 | 20.785 | 14.175 | 20.839 | 23.397 | 24.635 |
|                                       | Std Error | 0.007 | 0.007 | 0.007  | 0.007  | 0.006  | 0.006 | 0.006 | 0.007 | 0.006  | 0.006  | 0.007  | 0.007  | 0.007  | 0.007  | 0.007  |
|                                       | Upper CL  | 0.257 | 0.259 | 0.254  | 0.257  | 0.256  | 0.265 | 0.279 | 0.269 | 0.291  | 0.292  | 0.308  | 0.292  | 0.308  | 0.314  | 0.317  |
| Relative Index of Inequality          | Lower CL  | 0.231 | 0.233 | 0.228  | 0.231  | 0.231  | 0.240 | 0.254 | 0.243 | 0.266  | 0.267  | 0.282  | 0.266  | 0.282  | 0.288  | 0.291  |
|                                       | Estimate  | 1.53  | 1.54  | 1.51   | 1.52   | 1.52   | 1.58  | 1.66  | 1.60  | 1.74   | 1.75   | 1.84   | 1.74   | 1.84   | 1.88   | 1.90   |
|                                       | Std Error | 0.04  | 0.04  | 0.04   | 0.04   | 0.04   | 0.04  | 0.04  | 0.04  | 0.04   | 0.04   | 0.04   | 0.04   | 0.04   | 0.04   | 0.04   |
| Kunst Mackenbach Relative Index (KMI) | Upper CL  | 1.61  | 1.62  | 1.59   | 1.60   | 1.60   | 1.66  | 1.74  | 1.68  | 1.82   | 1.82   | 1.92   | 1.82   | 1.92   | 1.96   | 1.98   |
|                                       | Lower CL  | 1.44  | 1.46  | 1.43   | 1.44   | 1.44   | 1.50  | 1.59  | 1.52  | 1.66   | 1.67   | 1.76   | 1.66   | 1.76   | 1.80   | 1.82   |
|                                       | Estimate  | 7.43  | 7.63  | 7.12   | 7.40   | 7.34   | 8.44  | 10.91 | 8.96  | 14.50  | 14.70  | 24.37  | 14.47  | 24.50  | 32.95  | 39.42  |
| Relative Index (KMI)                  | Std Error | 0.74  | 0.77  | 0.67   | 0.72   | 0.69   | 0.90  | 1.43  | 1.02  | 2.41   | 2.47   | 6.55   | 2.47   | 6.74   | 12.06  | 17.33  |
|                                       | Upper CL  | 8.87  | 9.13  | 8.43   | 8.81   | 8.70   | 10.21 | 13.71 | 10.95 | 19.21  | 19.54  | 37.21  | 19.31  | 37.71  | 56.59  | 73.39  |
|                                       | Lower CL  | 5.99  | 6.13  | 5.80   | 5.99   | 5.98   | 6.68  | 8.11  | 6.97  | 9.78   | 9.86   | 11.52  | 9.64   | 11.30  | 9.30   | 5.46   |

---

WOMEN 1990 1991 1992 1993 1994 1995 1996 1997 1998 1999 2000 2001 2002 2003 2004

---

ABSOLUTE MEASURES

|                  |           |       |       |       |       |       |       |       |       |       |       |       |       |       |       |       |
|------------------|-----------|-------|-------|-------|-------|-------|-------|-------|-------|-------|-------|-------|-------|-------|-------|-------|
| Range Difference | Estimate  | 93.7  | 120.6 | 148.0 | 121.2 | 113.2 | 124.3 | 142.4 | 171.1 | 160.3 | 160.2 | 202.1 | 198.3 | 221.9 | 246.2 | 201.7 |
|                  | Std Error | 11.8  | 11.3  | 11.5  | 11.3  | 10.7  | 10.9  | 10.7  | 10.7  | 10.3  | 10.5  | 10.6  | 10.7  | 10.8  | 10.9  | 10.3  |
|                  | Upper CL  | 116.9 | 142.8 | 170.6 | 143.4 | 134.1 | 145.6 | 163.3 | 192.0 | 180.6 | 180.8 | 222.9 | 219.2 | 243.0 | 267.5 | 221.9 |
|                  | Lower CL  | 70.5  | 98.4  | 125.4 | 99.0  | 92.3  | 103.0 | 121.5 | 150.2 | 140.0 | 139.6 | 181.3 | 177.4 | 200.8 | 224.9 | 181.5 |

|                                 |           |       |       |       |       |       |       |       |       |       |       |       |       |        |       |        |
|---------------------------------|-----------|-------|-------|-------|-------|-------|-------|-------|-------|-------|-------|-------|-------|--------|-------|--------|
| Between-Group<br>Variance       | Estimate  | 1558  | 1811  | 3088  | 2160  | 1927  | 2862  | 3244  | 4202  | 3560  | 3717  | 5633  | 5377  | 6512   | 7965  | 5564   |
|                                 | Std Error | 296   | 313   | 416   | 342   | 295   | 372   | 392   | 450   | 404   | 423   | 535   | 529   | 589    | 686   | 515    |
|                                 | Upper CL  | 2137  | 2425  | 3904  | 2830  | 2505  | 3591  | 4013  | 5085  | 4351  | 4546  | 6682  | 6413  | 7666   | 9309  | 6574   |
|                                 | Lower CL  | 978   | 1197  | 2272  | 1490  | 1349  | 2132  | 2475  | 3320  | 2769  | 2888  | 4583  | 4340  | 5357   | 6620  | 4553   |
| Absolute<br>Concentration Index | Estimate  | 21.45 | 23.74 | 30.32 | 25.37 | 24.17 | 28.83 | 31.55 | 36.13 | 33.14 | 32.67 | 40.10 | 38.55 | 43.10  | 44.98 | 40.52  |
|                                 | Std Error | 2.07  | 2.06  | 2.06  | 2.04  | 1.89  | 1.92  | 1.92  | 1.91  | 1.86  | 1.87  | 1.87  | 1.87  | 1.89   | 1.89  | 1.81   |
|                                 | Upper CL  | 25.50 | 27.78 | 34.36 | 29.36 | 27.88 | 32.59 | 35.30 | 39.88 | 36.78 | 36.33 | 43.76 | 42.22 | 46.80  | 48.68 | 44.08  |
| Slope Index of<br>Inequality    | Lower CL  | 17.40 | 19.70 | 26.28 | 21.38 | 20.47 | 25.07 | 27.79 | 32.38 | 29.50 | 29.02 | 36.44 | 34.88 | 39.39  | 41.28 | 36.97  |
|                                 | Estimate  | 134.1 | 148.4 | 189.5 | 158.6 | 151.1 | 180.2 | 197.2 | 225.8 | 207.1 | 204.2 | 250.6 | 240.9 | 269.4  | 281.1 | 253.2  |
|                                 | Std Error | 12.9  | 12.9  | 12.9  | 12.7  | 11.8  | 12.0  | 12.0  | 12.0  | 11.6  | 11.7  | 11.7  | 11.7  | 11.8   | 11.8  | 11.3   |
|                                 | Upper CL  | 159.4 | 173.6 | 214.8 | 183.5 | 174.2 | 203.7 | 220.6 | 249.3 | 229.9 | 227.1 | 273.5 | 263.9 | 292.5  | 304.2 | 275.5  |
|                                 | Lower CL  | 108.7 | 123.1 | 164.2 | 133.6 | 127.9 | 156.7 | 173.7 | 202.4 | 184.4 | 181.3 | 227.8 | 218.0 | 246.2  | 258.0 | 231.0  |
| <u>RELATIVE MEASURES</u>        |           |       |       |       |       |       |       |       |       |       |       |       |       |        |       |        |
| Range Ratio                     | Estimate  | 1.50  | 1.67  | 1.87  | 1.69  | 1.75  | 1.76  | 1.94  | 2.19  | 2.15  | 2.10  | 2.55  | 2.44  | 2.82   | 3.07  | 2.79   |
|                                 | Std Error | 0.08  | 0.08  | 0.10  | 0.09  | 0.10  | 0.09  | 0.10  | 0.11  | 0.11  | 0.10  | 0.13  | 0.12  | 0.15   | 0.16  | 0.15   |
|                                 | Upper CL  | 1.66  | 1.85  | 2.07  | 1.86  | 1.95  | 1.95  | 2.15  | 2.42  | 2.38  | 2.31  | 2.82  | 2.69  | 3.12   | 3.40  | 3.10   |
|                                 | Lower CL  | 1.35  | 1.52  | 1.69  | 1.53  | 1.58  | 1.59  | 1.76  | 1.99  | 1.95  | 1.90  | 2.31  | 2.22  | 2.55   | 2.78  | 2.52   |
| Index of Disparity              | Estimate  | 32.00 | 41.44 | 44.50 | 36.17 | 55.06 | 42.44 | 57.23 | 68.41 | 65.07 | 51.98 | 69.64 | 62.26 | 84.00  | 81.42 | 86.78  |
|                                 | Std Error | 5.94  | 6.30  | 6.69  | 6.15  | 7.30  | 6.57  | 7.08  | 7.57  | 7.52  | 6.74  | 7.84  | 7.23  | 8.71   | 8.67  | 8.90   |
|                                 | Upper CL  | 43.64 | 53.80 | 57.61 | 48.22 | 69.36 | 55.31 | 71.10 | 83.24 | 79.80 | 65.19 | 85.00 | 76.43 | 101.07 | 98.41 | 104.23 |
|                                 | Lower CL  | 20.37 | 29.09 | 31.38 | 24.13 | 40.76 | 29.58 | 43.36 | 53.58 | 50.33 | 38.78 | 54.28 | 48.08 | 66.93  | 64.44 | 69.33  |
| Mean Log Deviation              | Estimate  | 0.014 | 0.016 | 0.028 | 0.020 | 0.022 | 0.030 | 0.034 | 0.043 | 0.040 | 0.041 | 0.063 | 0.057 | 0.072  | 0.087 | 0.073  |
|                                 | Std Error | 0.003 | 0.003 | 0.004 | 0.003 | 0.003 | 0.004 | 0.004 | 0.005 | 0.004 | 0.004 | 0.006 | 0.005 | 0.006  | 0.007 | 0.006  |
|                                 | Upper CL  | 0.019 | 0.022 | 0.035 | 0.026 | 0.029 | 0.038 | 0.043 | 0.052 | 0.048 | 0.050 | 0.074 | 0.067 | 0.084  | 0.099 | 0.085  |
|                                 | Lower CL  | 0.009 | 0.011 | 0.021 | 0.014 | 0.015 | 0.022 | 0.026 | 0.034 | 0.031 | 0.032 | 0.052 | 0.047 | 0.061  | 0.074 | 0.061  |
| Theil Index                     | Estimate  | 0.014 | 0.016 | 0.029 | 0.020 | 0.021 | 0.030 | 0.034 | 0.043 | 0.039 | 0.042 | 0.065 | 0.059 | 0.074  | 0.093 | 0.074  |
|                                 | Std Error | 0.003 | 0.003 | 0.004 | 0.003 | 0.003 | 0.004 | 0.004 | 0.004 | 0.004 | 0.005 | 0.006 | 0.005 | 0.006  | 0.007 | 0.006  |
|                                 | Upper CL  | 0.019 | 0.021 | 0.036 | 0.027 | 0.027 | 0.037 | 0.042 | 0.051 | 0.048 | 0.051 | 0.076 | 0.070 | 0.086  | 0.106 | 0.085  |

|                     |           |       |       |       |       |       |       |       |       |       |       |       |       |       |       |       |
|---------------------|-----------|-------|-------|-------|-------|-------|-------|-------|-------|-------|-------|-------|-------|-------|-------|-------|
|                     | Lower CL  | 0.009 | 0.011 | 0.021 | 0.014 | 0.015 | 0.022 | 0.026 | 0.034 | 0.031 | 0.033 | 0.054 | 0.049 | 0.062 | 0.079 | 0.062 |
| Relative            | Estimate  | 0.091 | 0.099 | 0.132 | 0.111 | 0.111 | 0.132 | 0.144 | 0.163 | 0.157 | 0.158 | 0.198 | 0.187 | 0.211 | 0.229 | 0.213 |
| Concentration Index | Std Error | 0.009 | 0.009 | 0.009 | 0.009 | 0.009 | 0.009 | 0.008 | 0.008 | 0.009 | 0.009 | 0.009 | 0.009 | 0.009 | 0.009 | 0.009 |
|                     | Upper CL  | 0.108 | 0.116 | 0.150 | 0.129 | 0.128 | 0.149 | 0.160 | 0.179 | 0.173 | 0.175 | 0.215 | 0.204 | 0.228 | 0.247 | 0.230 |
|                     | Lower CL  | 0.074 | 0.082 | 0.115 | 0.094 | 0.094 | 0.115 | 0.127 | 0.147 | 0.140 | 0.141 | 0.181 | 0.170 | 0.194 | 0.212 | 0.196 |
| Relative Index of   | Disparity | 0.57  | 0.62  | 0.83  | 0.70  | 0.70  | 0.83  | 0.90  | 1.02  | 0.98  | 0.99  | 1.24  | 1.17  | 1.32  | 1.43  | 1.33  |
| Inequality          | Std Error | 0.06  | 0.05  | 0.06  | 0.06  | 0.05  | 0.05  | 0.05  | 0.05  | 0.05  | 0.06  | 0.05  | 0.05  | 0.05  | 0.06  | 0.06  |
|                     | Upper CL  | 0.68  | 0.73  | 0.94  | 0.80  | 0.80  | 0.93  | 1.00  | 1.12  | 1.08  | 1.09  | 1.34  | 1.27  | 1.43  | 1.54  | 1.44  |
|                     | Lower CL  | 0.46  | 0.52  | 0.72  | 0.59  | 0.59  | 0.72  | 0.79  | 0.92  | 0.88  | 0.88  | 1.13  | 1.06  | 1.22  | 1.33  | 1.22  |
| Kunst Mackenbach    | Estimate  | 1.80  | 1.90  | 2.41  | 2.07  | 2.07  | 2.41  | 2.63  | 3.07  | 2.92  | 2.95  | 4.25  | 3.81  | 4.90  | 6.07  | 4.96  |
| Relative Index of   | Std Error | 0.11  | 0.11  | 0.16  | 0.13  | 0.13  | 0.16  | 0.18  | 0.22  | 0.20  | 0.21  | 0.38  | 0.31  | 0.47  | 0.70  | 0.49  |
| inequality          | Upper CL  | 2.01  | 2.12  | 2.72  | 2.32  | 2.32  | 2.71  | 2.97  | 3.50  | 3.32  | 3.36  | 4.98  | 4.42  | 5.82  | 7.44  | 5.92  |
|                     | Lower CL  | 1.59  | 1.68  | 2.09  | 1.81  | 1.82  | 2.10  | 2.29  | 2.65  | 2.52  | 2.53  | 3.51  | 3.20  | 3.97  | 4.70  | 4.01  |

CL, confidence limit. See HD\*Calc website for the interpretations of these measures: <http://seer.cancer.gov/hdcalc/measures.html>.

**Supplemental Figure** Percentage reductions in age-standardised mortality rates from 1990 by income quintile (Q5 is the highest): Swedish men and women aged 30–64, 1990–2004.

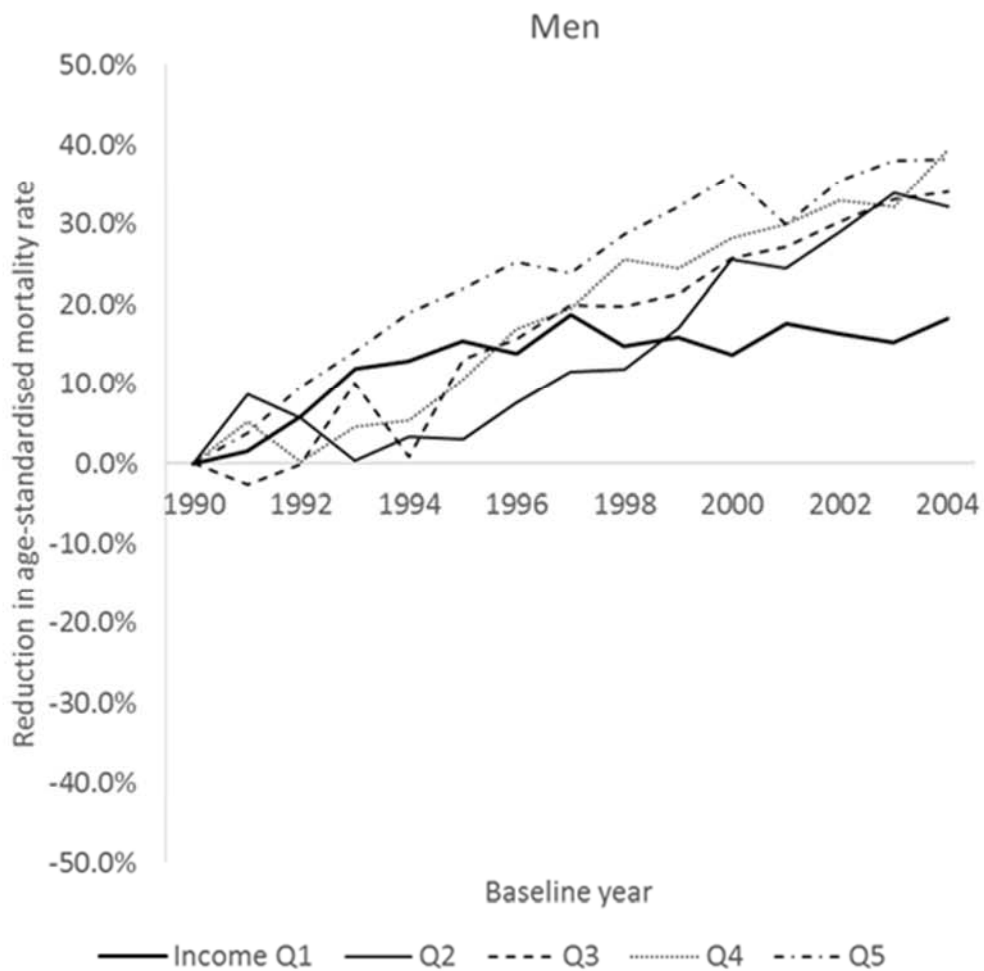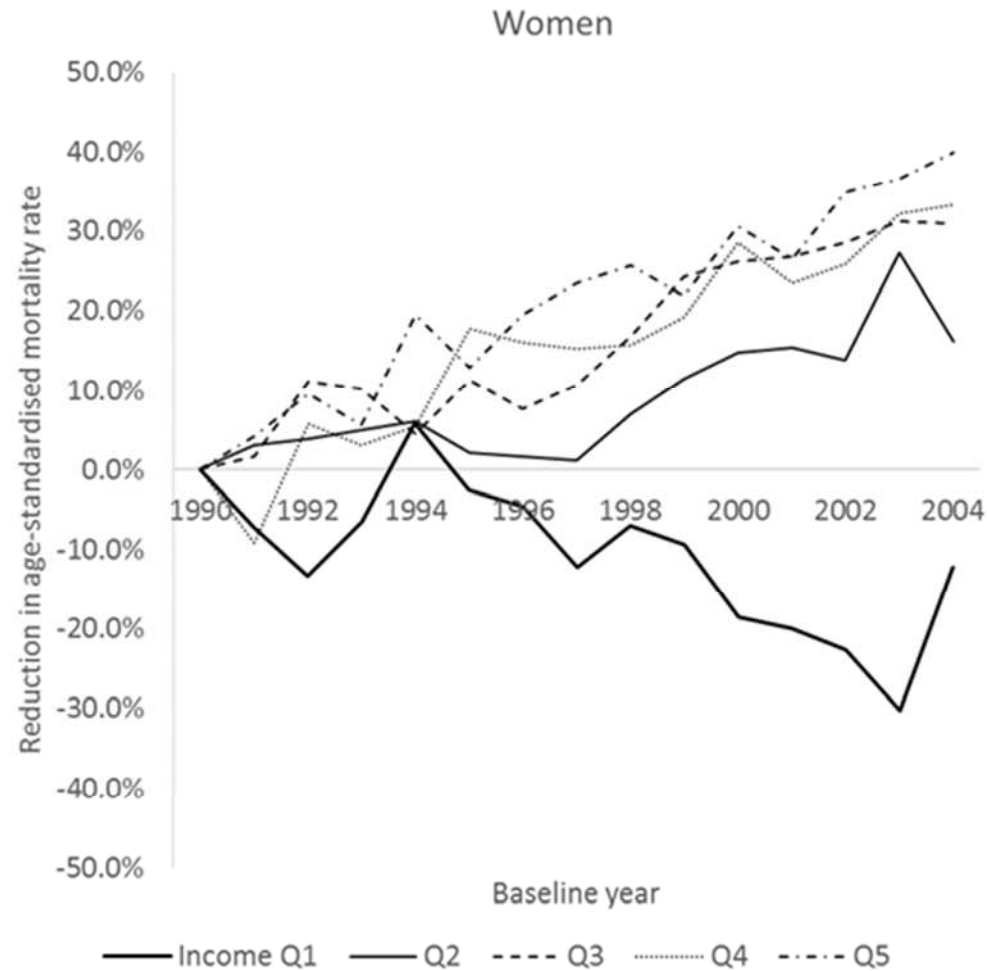

Supplement: jech-2013-203619-s1.pdf [file jech-2013-203619-s1.pdf]
